# Supplementary material for: Titanium and fluorine synergetic modification improves the electrochemical performance of Li(Ni0.8Co0.1Mn0.1)O2
Source: Royal Society of Chemistry journal article supplement (doi:10.1039/d1ta00124h), 2021-01-01
Supplement: d1ta00124h1.pdf [file d1ta00124h1.pdf]

## Supporting information

### **Titanium and fluorine synergetic modification improves the electrochemical performance of $\text{Li}(\text{Ni}_{0.8}\text{Co}_{0.1}\text{Mn}_{0.1})\text{O}_2$**

Zheng Si,<sup>a</sup> Baozhao Shi,<sup>a</sup> Jin Huang,<sup>b</sup> Ye Yu,<sup>b</sup> You Han,<sup>a</sup> Jinli Zhang,<sup>a,c</sup> Wei Li<sup>\*a</sup>

*<sup>a</sup>School of Chemical Engineering and Technology, Tianjin University, Tianjin 300350, P. R. China.*

*<sup>b</sup> Guizhou Zhenhua E-CHEM Co.,Ltd., Guiyang550014, P. R. China.*

*<sup>c</sup> School of Chemistry and Chemical Engineering, Shihezi University, Shihezi 832003, P. R. China.*

(Corresponding author: liwei@tju.edu.cn)

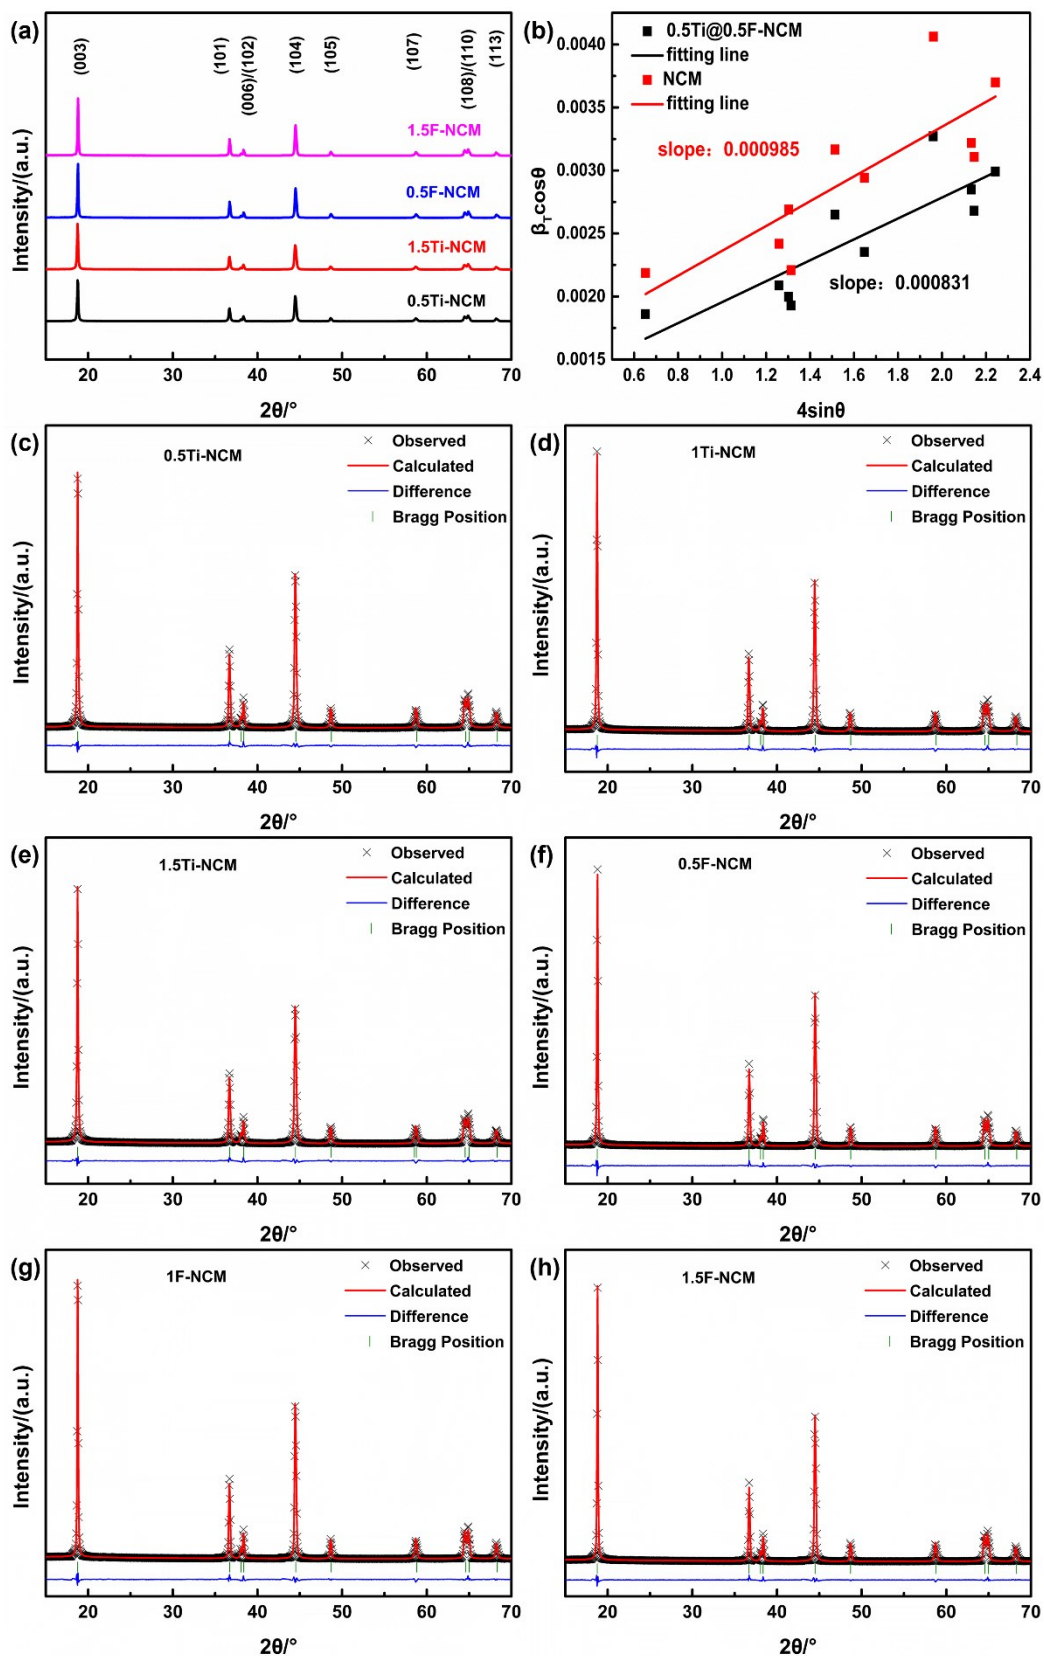

**Figure S1.** XRD patterns of 0.5Ti-NCM, 1.5Ti-NCM, 0.5F-NCM, and 1.5F-NCM (a), Williamson-Hall plots of NCM and 0.5Ti@0.5F-NCM (b), Rietveld refinement of the XRD patterns for 0.5Ti-NCM, 1Ti-NCM, 1.5Ti-NCM, 0.5F-NCM, 1F-NCM and 1.5F-NCM (c-g).

Williamson-Hall plot method:

In XRD pattern, the broadening ( $\beta_T$ ) of the peaks is due to the combine effect of crystallites size ( $\beta_D$ ) and lattice strain ( $\beta_\epsilon$ ).

$$\beta_T = \beta_D + \beta_\epsilon$$

$$\beta_T = \frac{K\lambda}{D\cos\theta} + 4\epsilon\tan\theta$$

therefore,

$$\beta_T\cos\theta = \epsilon(4\sin\theta) + \frac{K\lambda}{D}$$

So, the slope of Williamson-Hall plot is the lattice strain for materials.

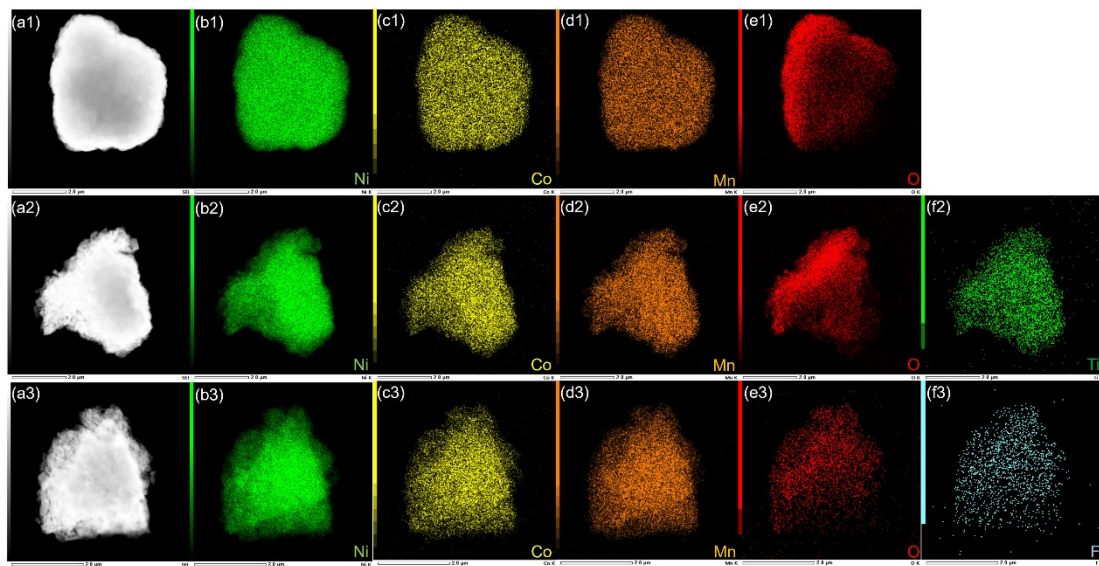

Figure S2. EDS mapping images of NCM (a1-e1), 1Ti-NCM(a2-f2) and 1F-NCM(a3-f3).

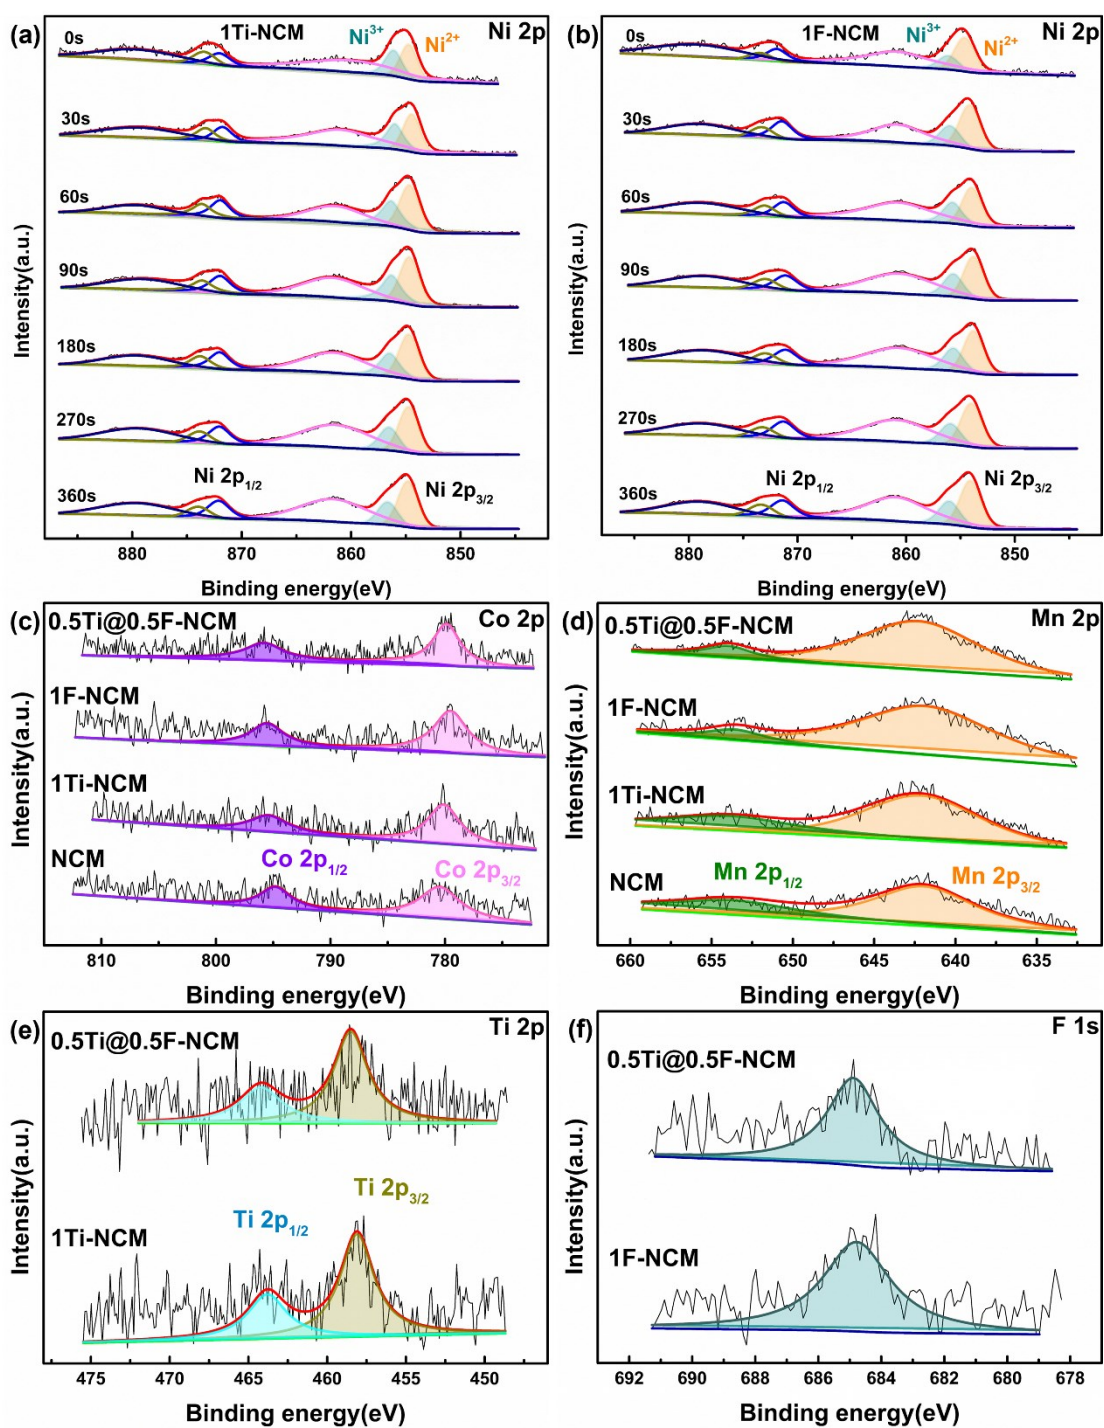

Figure S3. Ni 2p XPS spectra at different etching time for 1F-NCM (a) and 1Ti-NCM (b); XPS spectra of Co 2p(c), Mn 2p(d), Ti 2p(e), F 1s(f) at the etching time of 0 s for NCM, 1Ti-NCM, 1F-NCM, and 0.5Ti@0.5F-NCM.



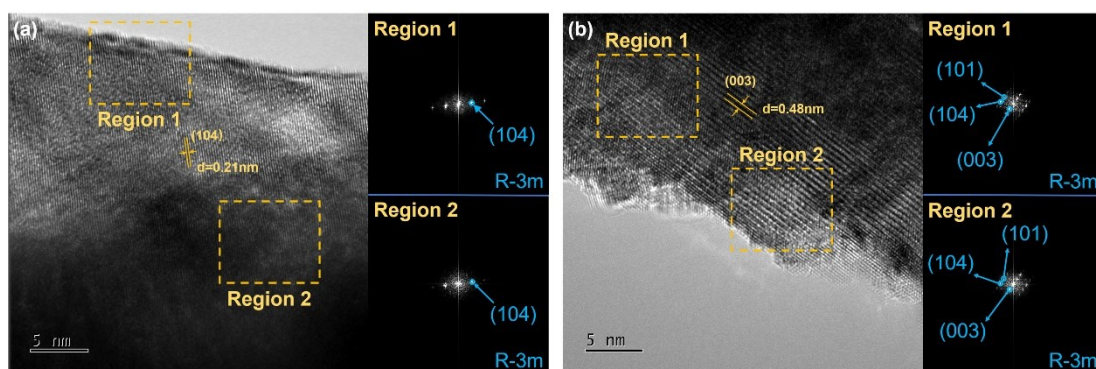

**Figure S4.** HRTEM images and corresponding FFT patterns for 1Ti-NCM (a) and 1F-NCM (b).

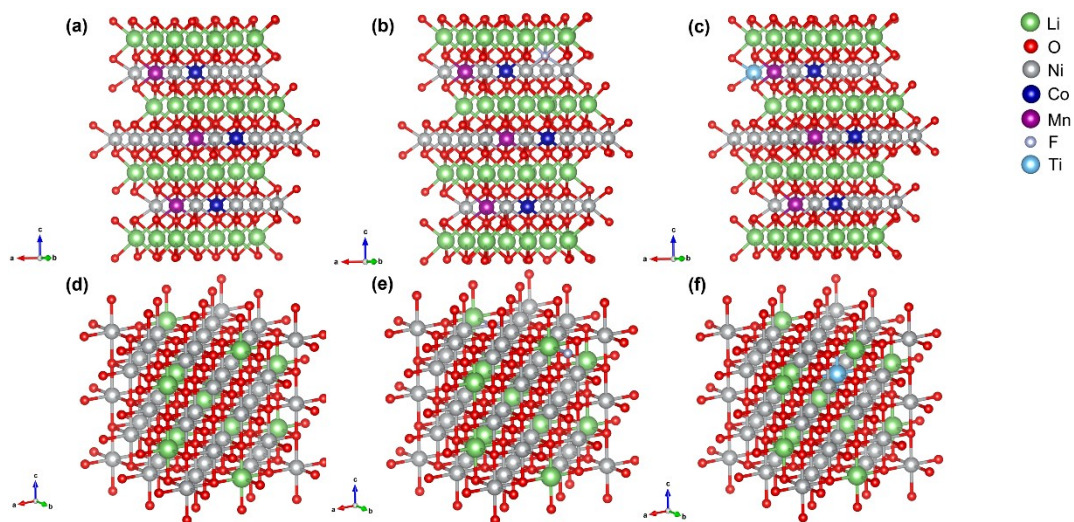

**Figure S5.** Schematic structures of layered NCM(a), layered F-doped NCM(b), Ti-doped NCM(c), rock-salt phase(d), F-doped rock-salt phase(e) and Ti-doped rock-salt phase(f).

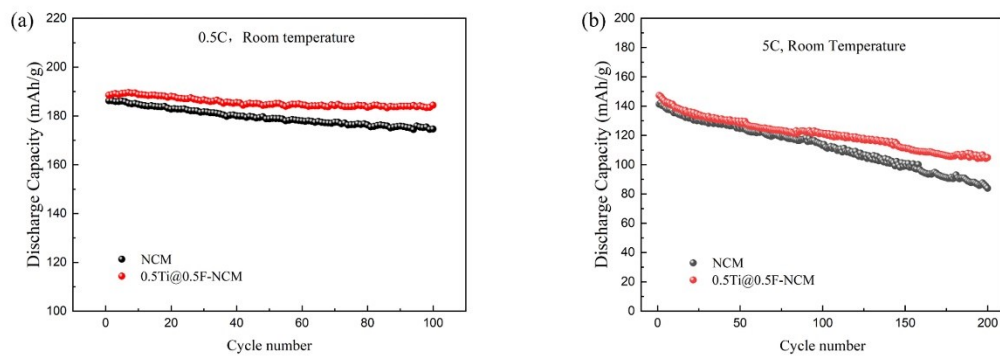

**Figure S6.** Electrochemical performance (2.8-4.3V) of NCM and 0.5Ti@0.5F-NCM. (a) Long-term cycling performance at 0.5C and room temperature. (b) Long-term cycling performance at 5C and room temperature.

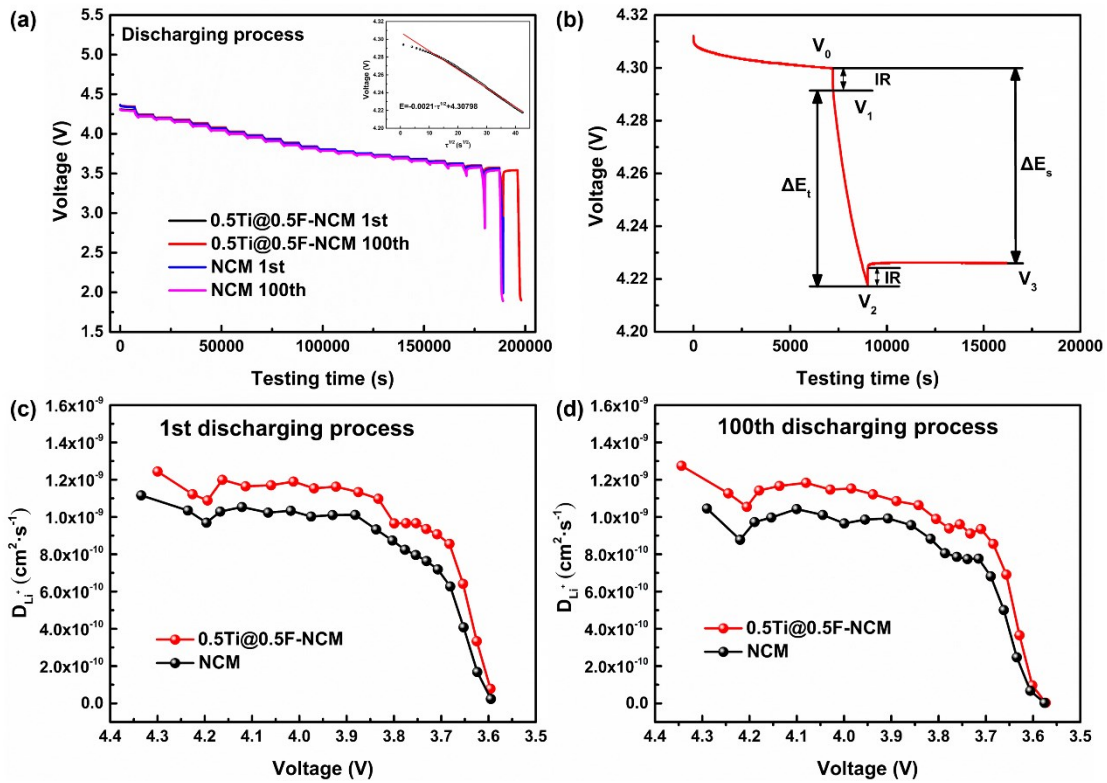

**Figure S7.** (a) The voltage changes with the testing time in the GITT experiment (insert figure: Linear fit of the cell voltage as a function of the  $\tau^{1/2}$ ); (b) Single titration step of GITT curve for 0.5Ti@0.5F-NCM. The Li-ion diffusion coefficient for NCM and 0.5Ti@0.5F-NCM during the discharging process of (c) the 1st cycle, (d) the 100th cycle.

The GITT experiment was performed on a half-cell. Apply a constant current pulse with a current of  $20 \text{ mA}\cdot\text{g}^{-1}$  for 30 minutes, then let it stand for 2 hours, and repeat this process until the voltage reaches the set value. The diffusion coefficient of  $\text{Li}^+$  can be calculated according to the following formula: <sup>1 2</sup>

$$D_{\text{Li}^+} = \frac{4}{\pi\tau} \left( \frac{m_B V_M}{M_B S} \right)^2 \left( \frac{\Delta E_s}{\Delta E_t} \right)^2 \quad \left( \tau \ll \frac{L^2}{D_{\text{Li}^+}} \right)$$

Where  $\tau$  is the time of the constant current pulse,  $S$  represents the contact area between the cathode active material and the electrolyte,  $\Delta E_t$  is the voltage change before and after the constant current pulse, and  $\Delta E_s$  is the steady-state voltage change.  $V_M$ ,  $M_B$  and  $m_B$  are the molar volume, molar mass and mass of the electrode material, respectively. The value of  $V_M$  is obtained from the Rietveld refinement results of GSAS.  $L$  is the diffusion length.

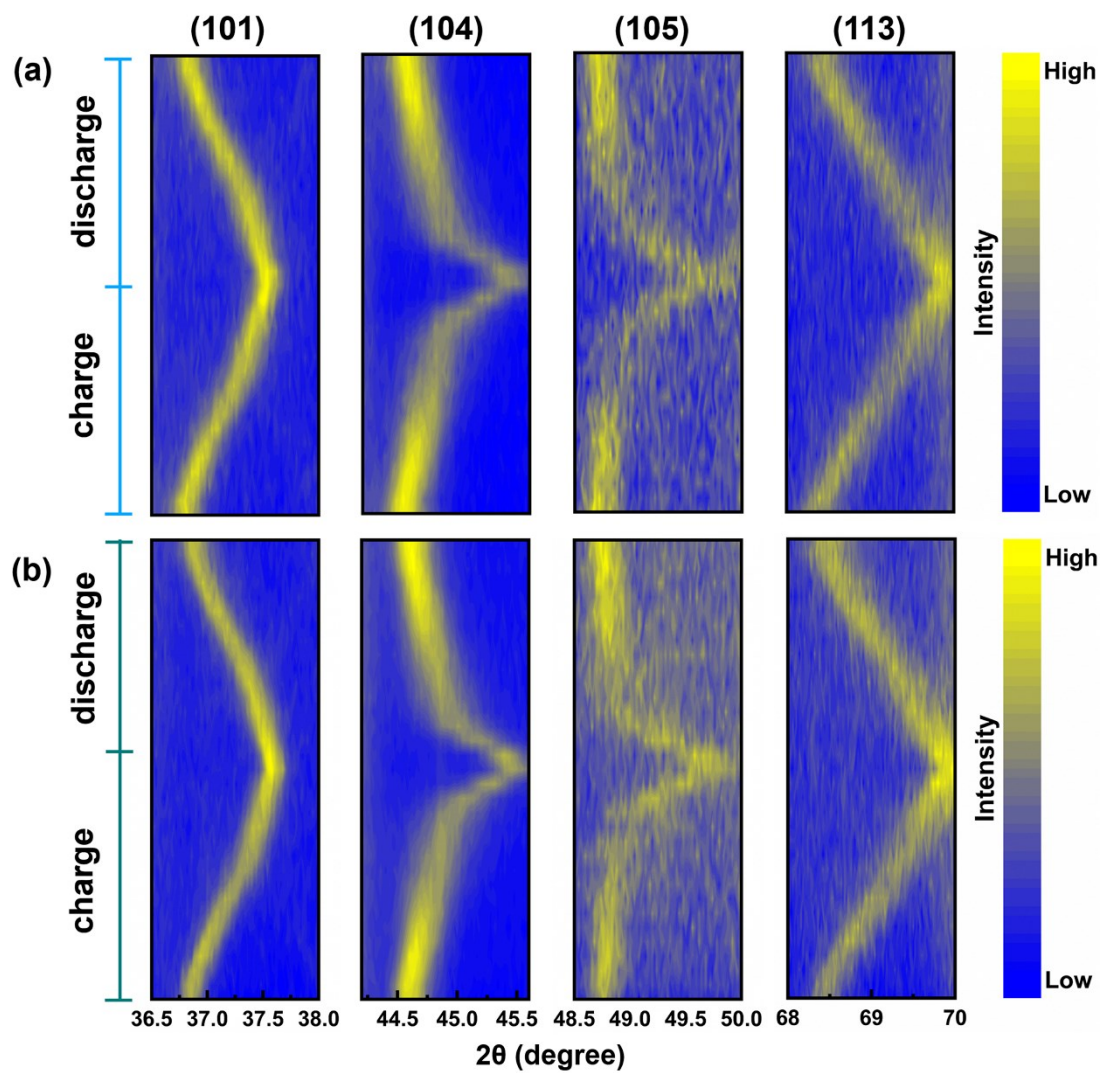

Figure S8. The corresponding contour plots for In-situ XRD tests, (a) NCM and (b) 0.5Ti@0.5F-NCM.



**Table S1.** Electrochemical performance comparison of Ti/F co-doped Ni-rich cathode with reported modified Ni-

| Modified method                                                                                                    | Voltage range (V) | Current density (mA g <sup>-1</sup> ) | Temperature (°C) | Capacity (mAh g <sup>-1</sup> ) | Retention             | Reference |
|--------------------------------------------------------------------------------------------------------------------|-------------------|---------------------------------------|------------------|---------------------------------|-----------------------|-----------|
| Ti <sup>4+</sup> doped LiNi <sub>0.8</sub> Co <sub>0.1</sub> Mn <sub>0.1</sub> O <sub>2</sub>                      | 2.8-4.6           | 1C=200mA g <sup>-1</sup>              | -                | 196(0.5C)                       | 84% (1C,100cycles)    | 3         |
| Ti <sup>4+</sup> doped LiNi <sub>0.8</sub> Co <sub>0.1</sub> Mn <sub>0.1</sub> O <sub>2</sub>                      | 2.7-4.3           | -                                     | 25±2             | 182.73(0.1C)                    | 89.84% (1C,100cycles) | 4         |
| Ti <sup>4+</sup> doped LiNi <sub>0.8</sub> Co <sub>0.1</sub> Mn <sub>0.1</sub> O <sub>2</sub>                      | 2.8-4.3           | 1C=180mA g <sup>-1</sup>              | -                | 165.60(1C)                      | 77.01% (1C,150cycles) | 5         |
| Ti <sup>4+</sup> and Al <sup>3+</sup> doped LiNi <sub>0.8</sub> Co <sub>0.1</sub> Mn <sub>0.1</sub> O <sub>2</sub> | 2.7-4.3           | 1C=180mA g <sup>-1</sup>              | 25               | 189.7(0.1C)                     | 76.75% (1C,200cycles) | 6         |
| Ti <sup>4+</sup> and K <sup>+</sup> doped LiNi <sub>0.8</sub> Co <sub>0.1</sub> Mn <sub>0.1</sub> O <sub>2</sub>   | 2.75-4.35         | 1C=180mA g <sup>-1</sup>              | 25               | 175.91(1C)                      | 91.19% (1C,200cycles) | 7         |
|                                                                                                                    |                   |                                       | 55               | 190.16(1C)                      | 84.38% (1C,100cycles) |           |
| W <sup>6+</sup> doped LiNi <sub>0.8</sub> Co <sub>0.1</sub> Mn <sub>0.1</sub> O <sub>2</sub>                       | 2.8-4.5           | 1C=200mA g <sup>-1</sup>              | 27               | 191.7(1C)                       | 92.1% (1C,100cycles)  | 8         |
| F <sup>-</sup> doped LiNi <sub>0.8</sub> Co <sub>0.1</sub> Mn <sub>0.1</sub> O <sub>2</sub>                        | 2.8-4.3           | 400 mA g <sup>-1</sup>                | RT               | 170.1                           | 94.3% (100cycles)     | 9         |
| F <sup>-</sup> doped LiNi <sub>0.8</sub> Co <sub>0.1</sub> Mn <sub>0.1</sub> O <sub>2</sub>                        | 2.8-4.3           | 100 mA g <sup>-1</sup>                | -                | 175                             | 93% (150cycles)       | 10        |
| F <sup>-</sup> modified LiNi <sub>0.8</sub> Co <sub>0.15</sub> Al <sub>0.05</sub> O <sub>2</sub>                   | 2.75-4.3          | -                                     | -                | 160(1C)                         | 73% (1C,200cycles)    | 11        |
| La and F modified LiNi <sub>0.8</sub> Co <sub>0.1</sub> Mn <sub>0.1</sub> O <sub>2</sub>                           | 2.7-4.3           | 1C=180mA g <sup>-1</sup>              | 25               | 200.34(0.1C)                    | 90.55% (1C,200cycles) | 12        |
|                                                                                                                    |                   |                                       | 60               | 192(1C)                         | 83.28% (1C,150cycles) |           |
| P and F doped LiNi <sub>0.8</sub> Co <sub>0.1</sub> Mn <sub>0.1</sub> O <sub>2</sub>                               | 3-4.3             | 1C=170mA g <sup>-1</sup>              | 25               | 199.6(0.1C)                     | 87.6% (1C,100cycles)  | 13        |
| Li-Nb-O coated and Nb <sup>5+</sup> doped LiNi <sub>0.8</sub> Co <sub>0.1</sub> Mn <sub>0.1</sub> O <sub>2</sub>   | 2.8-4.6           | 1C=200mA g <sup>-1</sup>              | -                | 219.1(0.1C)                     | 89.6% (1/3C,60cycles) | 14        |
| Zr <sup>4+</sup> doped LiNi <sub>0.8</sub> Co <sub>0.1</sub> Mn <sub>0.1</sub> O <sub>2</sub>                      | 2.8-4.3           | 1C=200mA g <sup>-1</sup>              | -                | 183.8(0.2C)                     | 84.2% (0.2C,60cycles) | 15        |
|                                                                                                                    |                   |                                       | RT               | 205.1(0.1C)                     | 93.9% (1C,100cycles)  |           |
| Ti <sup>4+</sup> and F <sup>-</sup> doped LiNi <sub>0.8</sub> Co <sub>0.1</sub> Mn <sub>0.1</sub> O <sub>2</sub>   | 2.8-4.3           | 1C=200 mA g <sup>-1</sup>             |                  |                                 | 89.7% (1C,200cycles)  | This work |
|                                                                                                                    |                   |                                       |                  |                                 | 81.4% (1C,300cycles)  |           |
|                                                                                                                    |                   |                                       | 45               | 202.2(1C)                       | 94.7% (1C,100cycles)  |           |
|                                                                                                                    |                   |                                       |                  |                                 | 88.1% (1C,200cycles)  |           |

rich cathode materials.

Note: ‘-’ indicates that no information about current density or temperature was found in the reference. ‘RT’ denotes the room temperature.

**Table S2.** Binding energy and relative content of Ni<sup>2+</sup>/Ni<sup>3+</sup> in Ni 2p XPS spectra for all samples

| Sample         | Etching times | Ni <sup>2+</sup>       |                         | Ni <sup>3+</sup>       |                         |
|----------------|---------------|------------------------|-------------------------|------------------------|-------------------------|
|                |               | Binding energy<br>(eV) | Relative content<br>(%) | Binding energy<br>(eV) | Relative content<br>(%) |
| NCM            | 0s            | 854.60                 | 52.67                   | 856.10                 | 47.33                   |
|                | 30s           | 854.39                 | 55.18                   | 856.01                 | 44.82                   |
|                | 60s           | 854.29                 | 58.55                   | 855.99                 | 41.45                   |
|                | 90s           | 854.29                 | 67.08                   | 856.17                 | 32.92                   |
|                | 180s          | 854.35                 | 60.22                   | 856.24                 | 39.78                   |
|                | 270s          | 854.34                 | 63.90                   | 856.23                 | 36.10                   |
|                | 360s          | 854.41                 | 65.46                   | 856.31                 | 34.54                   |
| 0.5Ti@0.5F-NCM | 0s            | 854.85                 | 71.92                   | 856.55                 | 28.08                   |
|                | 30s           | 854.25                 | 59.41                   | 855.90                 | 40.59                   |
|                | 60s           | 854.23                 | 60.50                   | 855.94                 | 39.50                   |
|                | 90s           | 854.17                 | 65.34                   | 855.90                 | 34.66                   |
|                | 180s          | 854.18                 | 64.42                   | 856.04                 | 35.58                   |
|                | 270s          | 854.26                 | 65.44                   | 856.09                 | 34.56                   |
|                | 360s          | 854.28                 | 64.90                   | 856.11                 | 35.10                   |
| 1F-NCM         | 0s            | 854.61                 | 69.71                   | 856.12                 | 30.29                   |
|                | 30s           | 854.14                 | 67.51                   | 855.97                 | 32.49                   |
|                | 60s           | 853.96                 | 59.25                   | 855.73                 | 40.75                   |
|                | 90s           | 853.87                 | 61.30                   | 855.66                 | 38.70                   |
|                | 180s          | 853.80                 | 61.57                   | 855.65                 | 38.43                   |
|                | 270s          | 854.00                 | 65.76                   | 855.91                 | 34.24                   |
|                | 360s          | 854.08                 | 64.28                   | 856.03                 | 35.72                   |
| 1Ti-NCM        | 0s            | 854.71                 | 53.91                   | 856.10                 | 46.09                   |
|                | 30s           | 854.44                 | 52.73                   | 855.99                 | 47.27                   |
|                | 60s           | 854.64                 | 55.80                   | 856.34                 | 44.20                   |
|                | 90s           | 854.66                 | 57.74                   | 856.3                  | 42.26                   |
|                | 180s          | 854.71                 | 60.38                   | 856.48                 | 39.62                   |
|                | 270s          | 854.74                 | 65.99                   | 856.53                 | 34.01                   |
|                | 360s          | 854.80                 | 66.75                   | 856.65                 | 33.25                   |

**Table S3.** Formation energy of doping for different doping elements in the layered phase

|                | Formation energy of doping (eV) |
|----------------|---------------------------------|
| F doped NCM    | -2.27086496                     |
| Ti doped NCM   | -6.41273274                     |
| Ti@F doped NCM | -8.83634598                     |

**Table S4.** Formation energy of rock salt phase after different doping elements

|            | Formation energy (eV) |
|------------|-----------------------|
| undoped    | -102.7898193          |
| F doped    | -104.5824587          |
| Ti doped   | -109.3010156          |
| Ti@F doped | -111.1030988          |

Table S5. Elemental compositions of NCM and the modified samples

| Samples        | Elemental composition (Atomic %) |      |       |       |      |      |
|----------------|----------------------------------|------|-------|-------|------|------|
|                | Ni                               | Co   | Mn    | O     | Ti   | F    |
| NCM            | 4.49                             | 1.86 | 2.85  | 90.8  | -    | -    |
| 1Ti-NCM        | 9.3                              | 1.7  | 3.58  | 84.28 | 1.13 | -    |
| 1F-NCM         | 27.04                            | 3.88 | 16.37 | 51.6  | -    | 1.1  |
| 0.5Ti@0.5F-NCM | 9.44                             | 2.1  | 6.48  | 78.44 | 1.26 | 2.29 |

**Reference:**

1. C. Zhang, J. Wan, Y. Li, S. Zheng, K. Zhou, D. Wang, D. Wang, C. Hong, Z. Gong and Y. Yang, *Journal of Materials Chemistry A*, 2020, **8**, 6893-6901.
2. M. Dong, Z. Wang, H. Li, H. Guo, X. Li, K. Shih and J. Wang, *ACS Sustainable Chemistry & Engineering*, 2017, **5**, 10199-10205.
3. H. Sun, Z. Cao, T. Wang, R. Lin, Y. Li, X. Liu, L. Zhang, F. Lin, Y. Huang and W. Luo, *Materials Today Energy*, 2019, **13**, 145-151.
4. R.-K. Yang, Z.-G. Wu, Y.-C. Li, R. Li, L. Qiu, D. Wang, L. Yang and X.-D. Guo, *Ionics*, 2020, **26**, 3223-3230.
5. D. Zhang, Y. Liu, L. Wu, L. Feng, S. Jin, R. Zhang and M. Jin, *Electrochimica Acta*, 2019, **328**, 135086.
6. H. Liu, R. Yang, W. Yang, C. Bai, Y.-C. Li, G. Wang, Y. Liu, W. Xiang, Z. Wu and X. Guo, *Journal of Materials Science*, 2020, **56**, 2347-2359.
7. W. Yao, Y. Liu, D. Li, Q. Zhang, S. Zhong, H. Cheng and Z. Yan, *The Journal of Physical Chemistry C*, 2020, **124**, 2346-2356.
8. G. Shang, Y. Tang, Y. Lai, J. Wu, X. Yang, H. Li, C. Peng, J. Zheng and Z. Zhang, *Journal of Power Sources*, 2019, **423**, 246-254.
9. P. Yue, Z. Wang, H. Guo, X. Xiong and X. Li, *Electrochimica Acta*, 2013, **92**, 1-8.
10. H. Kim, S.-B. Kim, D.-H. Park and K.-W. Park, *Energies*, 2020, **13**, 4808.
11. S. Xia, F. Li, F. Cheng, X. Li, C. Sun, J.-J. Liu and G. Hong, *Journal of The Electrochemical Society*, 2018, **165**, A1019-A1026.
12. H. Yang, H. H. Wu, M. Ge, L. Li, Y. Yuan, Q. Yao, J. Chen, L. Xia, J. Zheng, Z. Chen, J. Duan, K. Kisslinger, X. C. Zeng, W. K. Lee, Q. Zhang and J. Lu, *Advanced Functional Materials*, 2019, **29**, 1808825.
13. A. Yuan, H. Tang, L. Liu, J. Ying, L. Tan, L. Tan and R. Sun, *Journal of Alloys and Compounds*, 2020, **844**, 156210.
14. F. Xin, H. Zhou, X. Chen, M. Zuba, N. Chernova, G. Zhou and M. S. Whittingham, *ACS Appl Mater Interfaces*, 2019, **11**, 34889-34894.
15. S. Gao, X. Zhan and Y.-T. Cheng, *Journal of Power Sources*, 2019, **410-411**, 45-52.
